1 Impact of school-based malaria screening and treatment on *P. falciparum* infection and anemia  
2 prevalence in two transmission settings in Malawi  
3

4 Lauren M. Cohee, Center for Vaccine Development and Global Health, University of Maryland  
5 School of Medicine, Baltimore, MD, USA

6 Ingrid Peterson, Center for Vaccine Development and Global Health, University of Maryland  
7 School of Medicine, Baltimore, MD, USA

8 Jenna E. Coalson, Department of Epidemiology, School of Public Health, University of  
9 Michigan, Ann Arbor, MI, USA; Current affiliation: Eck Institute for Global  
10 Health, University of Notre Dame, Notre Dame, IN, USA

11 Clarissa Valim, Department of Global Health, Boston University School of Public Health,  
12 Boston, MA, USA

13 Moses Chilombe, Malaria Alert Center, University of Malawi College of Medicine, Blantyre,  
14 Malawi

15 Andrew Ngwira, Malaria Alert Center, University of Malawi College of Medicine, Blantyre,  
16 Malawi

17 Andy Bauleni, Malaria Alert Center, University of Malawi College of Medicine, Blantyre,  
18 Malawi

19 Sarah Schaffer-DeRoo, University of Maryland School of Medicine, Baltimore, MD, USA;  
20 Current affiliation: Children's National Medical Center, Washington, DC,  
21 USA

22 Karl B. Seydel, College of Osteopathic Medicine, Michigan State University, East Lansing, MI,  
23 USA

24 Mark L. Wilson, Department of Epidemiology, School of Public Health, University of Michigan,  
25 Ann Arbor, MI, USA

26 Terrie E. Taylor, College of Osteopathic Medicine, Michigan State University, East Lansing, MI,  
27 USA

28 Don P. Mathanga, Malaria Alert Center, University of Malawi College of Medicine, Blantyre,  
29 Malawi

30 Miriam K. Laufer, Center for Vaccine Development and Global Health, University of Maryland  
31 School of Medicine, Baltimore, MD, USA

32  
33 Keywords: chemoprevention, anemia, schoolchildren, adolescent, intervention

34 Running title: School-based malaria screening-and-treatment

35 Corresponding author: Dr. Lauren M Cohee

36 Center for Vaccine Development and Global Health

37 University of Maryland School of Medicine

38 Baltimore, MD 21201 USA

39 [lcohee@som.umaryland.edu](mailto:lcohee@som.umaryland.edu); 919-699-1592

40 Summary: Malaria screening-and-treatment reduced *P. falciparum* infections but not anemia.  
41 Because rapid diagnostic tests failed to detect low-density infections, screening tests with higher  
42 sensitivity may be needed in low transmission areas where low-density infections make-up a  
43 larger proportion of infections.  
44

45 **Abstract (250 word limit – Currently 226)**

46 **Background:** In areas highly endemic for malaria, *Plasmodium falciparum* (*Pf*) infection  
47 prevalence peaks in school-age children, adversely affecting their health and education. School-  
48 based intermittent preventive treatment reduces this burden, however concerns about cost and  
49 widespread use of antimalarial drugs have limited enthusiasm for this approach. School-based  
50 screening-and-treatment is an attractive alternative. We conducted a school-based cohort study to  
51 evaluate the impact of screening-and-treatment on the prevalence of *Pf* infection and anemia in  
52 two different transmission settings.

53 **Methods:** We screened 704 students in four Malawian primary schools for *Pf* infection using  
54 rapid diagnostic tests (RDTs). Those testing positive were treated with artemether-lumefantrine.  
55 Outcomes were *Pf* infections detected by microscopy or PCR and anemia after six weeks.

56 **Results:** Prevalence of infection by RDT at screening was 37% (range among schools 9-64%).  
57 We detected a significant reduction after six weeks in infections by microscopy (adjusted relative  
58 reduction (aRR) 47.1%,  $p < 0.0001$ ) and PCR (aRR 23.1%,  $p < 0.0001$ ), but no reduction in  
59 anemia. In low, seasonal prevalence areas, sub-patent infections at screening led to persistent  
60 infection, but not disease, during follow-up. In high transmission settings, new infections  
61 frequently occurred within six weeks after treatment.

62 **Conclusions:** School-based screening-and-treatment reduced *Pf* infection but not anemia. This  
63 approach could be enhanced in low transmission settings by using more sensitive screening tests  
64 and in high transmission settings by repeating the intervention or using longer acting drugs.

65 **Background**

66 Despite global declines in morbidity and mortality over the last two decades, malaria remains a  
67 significant public health burden in most of sub-Saharan Africa.<sup>1</sup> Malaria surveillance and  
68 research has largely focused on children less than five-years old and pregnant women, the groups  
69 at highest risk of adverse outcomes. Expansion of surveillance to other age-groups has revealed  
70 an under-appreciated burden of *Plasmodium falciparum* (*Pf*) infection in school-age children.<sup>2</sup>  
71 While severe disease is less likely in school-age children when compared with younger children,  
72 infection in school-age children is associated with anemia<sup>3-9</sup>, increased school absenteeism<sup>10-12</sup>,  
73 and lower performance on cognitive testing<sup>3,12-15</sup>.

74  
75 School-based preventive treatment of malaria is a promising strategy to reduce *Pf* infection,  
76 clinical malaria, and anemia in school-age children.<sup>16</sup> Preventive treatment includes both  
77 “intermittent preventive treatment”, in which all students are treated regardless of infection  
78 status, and “screen-and-treat”, in which students are screened for infection with a point of care  
79 test and treated if positive. To our knowledge, the only clinical trial evaluating the screen-and-  
80 treat approach in schoolchildren demonstrated no decrease in prevalence of infection or  
81 anemia.<sup>17</sup> One explanation for the lack of efficacy in this large, cluster-randomized trial is the  
82 use of a relatively short-acting treatment, artemether-lumefantrine (AL) (duration of prevention  
83 13.8 days<sup>18</sup>) and students were screened once per school term, allowing substantial time for re-  
84 infection. Furthermore, the rapid diagnostic tests (RDTs) used for screening are not sensitive in  
85 detecting low-density infections, which are common in school-age children and also comprise a  
86 larger proportion of infections in low prevalence settings, such as coastal Kenya where this trial  
87 took place.<sup>19</sup> Nevertheless, a screen-and-treat approach has multiple advantages, including

88 limiting treatment to test-positive children, which decreases the cost and adverse effects of  
89 medication and the selective pressure for drug resistance. Given these advantages, more evidence  
90 evaluating and optimizing the screen-and-treat approach will determine the potential role of  
91 screen-and-treat as a tool to maximize health.

92  
93 We conducted a school-based, prospective, cohort study to evaluate the epidemiology of *Pf*  
94 infections in school-age children and determine the impact of the screen-and-treat approach on  
95 *Pf* infection and anemia prevalence among students in two different transmission settings. We  
96 hypothesized that RDTs frequently fail to detect low-parasite-density infections, and that these  
97 infections contribute considerably to the burden and health consequences of *Pf* infection in  
98 school-age children. We further hypothesized that school-age children are frequently reinfected  
99 following treatment, necessitating repeated screening and administration of antimalarial therapy  
100 to maintain the impact of the intervention. The relative importance of these potential barriers to  
101 the effectiveness of screen-and-treat interventions in schoolchildren may differ based on the  
102 transmission setting. Our ultimate goal is to inform the development of malaria control  
103 interventions to improve the health of school-age children.

104

## 105 **Methods**

### 106 **Study sites**

107 We conducted school-based cohort studies of students in four schools that were selected from  
108 malaria surveillance sites in southern Malawi.<sup>20</sup> Two schools (in Maseya and Makhuwira) had  
109 high parasite prevalence in school-age children (>40% in the rainy and dry seasons of 2012-  
110 2014 and less than a twofold prevalence difference between seasons). The other two schools (in

111 Bvumbwe and Ngowe) had lower, seasonally variable transmission (<15% prevalence in the  
112 rainy and dry seasons of 2012-2014 and at least a twofold difference between seasons). Cohorts  
113 were followed at the end of the rainy season (April-May) and during the dry season (September-  
114 October) of 2015, when *Pf* transmission is high and low, respectively. Routine malaria control  
115 measures in place during our study included long-lasting insecticide treated nets (LLINs) that  
116 were distributed nationally in 2012, and freely available malaria diagnosis (using RDTs) and  
117 treatment (with AL) in government-operated health facilities.

### 118 **Study design**

119 Prior to initiating the study, sensitization meetings were held with community leaders, school  
120 leaders, and district and local government officials, who provided permission to conduct the  
121 study. Using a random number generator, 15 students per grade-level (grades 1-8), were invited  
122 to participate. Students were excluded if they did not have a parent/guardian available to provide  
123 consent, would not be attending the school for the duration of the study, or had a known allergy  
124 to AL. To evaluate the intervention separately in each season, students enrolled in the rainy  
125 season cohort were excluded from participating in the dry season cohort.

126  
127 Visits were conducted at baseline (1-2 weeks after enrollment), and 1, 2 and 6 weeks later. At the  
128 baseline visit, a finger prick blood sample was obtained for point-of-care detection of infection  
129 using a histidine-rich protein 2-based RDT in accordance with manufacturer instructions  
130 (Paracheck Orchid Biomedical Systems, Goa, India or SD Bioline, Standard Diagnostics Inc.,  
131 Suwon City, Republic of Korea), measurement of hemoglobin (Hemocue, Angelholm, Sweden),  
132 microscopy and molecular detection tests for *P. falciparum*. Students with infections detected by  
133 RDT were treated with AL (Novartis Pharma AG or Ajanta Pharma Ltd) using weight-based

134 dosing. At each follow-up visit, another blood sample was obtained for microscopy and  
135 molecular detection of parasites, which was not conducted in real time, and a study team member  
136 conducted a one-on-one interview with each student about bed net use the night prior, current or  
137 recent illness, and use of antimalarial treatment. At the final visit, RDT and hemoglobin were  
138 repeated, and intercurrent fever or malaria treatment was identified by parent interview and  
139 review of portable medical records ("health passports"). Data was collected on android-based  
140 tablets using OpenDataKit and RedCap.<sup>21</sup>

#### 141 **Sample size determination**

142 Using surveillance data collected in the communities surrounding the intervention schools in the  
143 prior three years, we anticipated a 27% overall prevalence of *Pf* infection detected by PCR in  
144 school-age children. By sampling 320 students (10 students within each of 8 grades, in four  
145 schools) in each season, we would have 80% power to detect a 40% decrease in the overall  
146 prevalence of infection after the screen-and-treat intervention. To account for loss to follow-up,  
147 we sampled 15 students per grade in each school.

#### 148 **Laboratory methods**

149 Thick smear microscopy slides were stained with Giemsa stain and read by trained, blinded  
150 microscopists. Quality control was conducted using published procedures.<sup>22</sup> Molecular detection  
151 of parasites was conducted using real-time PCR to detect *P. falciparum* lactate dehydrogenase  
152 (*Pf*LDH) DNA, as described previously.<sup>23</sup> Plates were run in duplicate and the sample was  
153 considered positive if a positive result was detected in at least one run.

#### 154 **Statistical analysis**

155 *Pf* infection was analyzed as a binary variable. Infections detected by microscopy and PCR were  
156 analyzed separately. Sub-patent infections were defined as those that were PCR-positive but

157 RDT-negative. Treatment groups were defined based on RDT result at baseline. RDT-positive  
158 students with negative PCR results were considered negative for active infection, but were  
159 included in the treatment group for analysis because they received AL in the intervention.  
160 Anemia was defined as hemoglobin less than 11.0 g/dL. Non-study administered malaria  
161 treatment at baseline or during follow-up was defined as any treatment with an effective  
162 antimalarial reported by the student, during the parent interview, or in the student's health  
163 passport.

164  
165 To analyze repeated measures of the following binary outcomes, we used log-binomial and  
166 logistic generalized estimating equation (GEE) models, with unstructured covariance and  
167 clustering within students nested in schools: PCR-detected *Pf* infection, microscopy-detected *Pf*  
168 infection, sub-patent infection, and fever in the past 48 hours. GEE models were used to estimate  
169 proportions and odds ratios. Logistic regression was used to model anemia at day 42, and a linear  
170 model was used to model hemoglobin at day 42; both models included adjustment for anemia  
171 status at baseline. All models were adjusted *a priori* for factors known to be associated with  
172 malaria risk: school (as a proxy for transmission intensity), age 5 to 9 years versus 10 to 15  
173 years, and season of recruitment; other potential confounding variables were included in the  
174 model if they were significant at  $P < 0.05$ . An interaction term for school\*day was significant in  
175 models of PCR-detected *Pf* infection, microscopy-detected *Pf* infection and was included in  
176 these models. Relative difference in prevalence was calculated as the difference between  
177 prevalence at baseline and after six weeks divided by baseline prevalence. Analyses were  
178 conducted using SAS statistical software version 9.3 (SAS Institute, Cary, NC).

179 **Human subjects**

180 Written informed consent and assent were obtained from guardians and children in accordance  
181 with Good Clinical Practice guidelines. Approval for this study was obtained from the University  
182 of Malawi College of Medicine Research and Ethics Committee and the Institutional Review  
183 Board of the University of Maryland, Baltimore.

184

## 185 **Results**

186 A total of 786 students were enrolled: 405 in the rainy season cohort and 381 in the dry season  
187 cohort (Figure 1). Screening-and-treatment was conducted at baseline for 704 (90%) students,  
188 and complete follow-up was obtained for 616 (78%) students. Baseline characteristics, including  
189 sex, bed net use, anemia, recent fever and prevalence of *Pf* infection, varied significantly by  
190 school (Table 1). Students had increased odds of being RDT-positive and hence, receiving  
191 treatment, if they attended a higher prevalence school, participated in the rainy season cohort,  
192 were male, were anemic, or had recently taken an antimalarial medication (Table 2).

193

194 Sub-patent infections were common in the study population. Among the 259 students with  
195 infections detected by PCR or microscopy at baseline, 63 (24.3%) were negative by RDT. While  
196 these sub-patent infections were more likely to occur in the high transmission schools  
197 (Supplementary Table S1), they make up a larger proportion of all infections in Bvumbwe, the  
198 school with the lowest prevalence of infection [42.8% vs. 17.3%, (p=0.003) of infections were  
199 sub-patent Bvumbwe vs. the other three schools combined (Table 1)]. Compared to microscopy  
200 and PCR, respectively, RDTs had a sensitivity of 91.1% and 76.3% and specificity of 76.1% and  
201 85.9%. We evaluated the impact of screening-and-treatment on *Pf* infections detected both by  
202 microscopy, to facilitate comparisons with prior studies and assess impact on infections more



203 likely to be clinically relevant, and by PCR, to assess the impact including lower density  
204 infections.

205

### 206 **Impact of screening and treatment on prevalence of infection after six weeks**

207 In total, 259 students (37%) were RDT-positive at baseline and were treated with AL. Six weeks  
208 after screening-and-treatment, we measured a 47.1% and 23.1% reduction in the prevalence of  
209 infections detected by microscopy and PCR, respectively (both  $p < 0.001$ , Table 3). In analyses  
210 stratified by transmission setting, the prevalence of infections detected by microscopy decreased  
211 by 42.1% in high transmission schools and by 66.8% in low, seasonal transmission schools  
212 ( $p < 0.001$ ,  $p = 0.003$ , respectively). For infections detected by PCR, we observed a 35.0% decrease  
213 in prevalence in the high transmission schools, but a non-statistically significant 13.3% increase  
214 in prevalence in the low, seasonal transmission schools ( $p < 0.001$ ,  $p = 0.40$ , respectively). Results  
215 by school are shown in Figure S1.

216

### 217 **Patterns of infection and variation in the effect of screening-and-treatment by transmission** 218 **setting**

219 To further evaluate patterns of infection and the effect of screening-and-treatment in different  
220 transmission settings, we examined school-specific differences in the prevalence of infection  
221 during follow-up among treated and untreated students (Figure 2). In the higher transmission  
222 schools, RDTs detected most infections and treatment effectively cleared those infections at the  
223 one and two week follow-up visits. However, prevalence of infection among both treated and  
224 untreated students increased between two and six weeks following the intervention (Figure 3B  
225 and 3D).

226

227 In the schools with lower, seasonal transmission, 38% (22/58) of infections at baseline were sub-  
228 patent, and thus not detected by RDTs and therefore not treated. Treatment cleared infections  
229 detected by microscopy in the students who received treatment (Table 3, Figure 3A). However,  
230 there was no overall reduction in infections detected by PCR due to both persistence of  
231 infections detected by PCR in untreated students and either uncleared or new infections detected  
232 by PCR in the treated students (Table 3, Figure 3C).

233

#### 234 **Impact of screening-and-treatment on anemia**

235 At baseline, 15.1% (95% CI: 12.4%, 17.7%) of students were anemic and the mean hemoglobin  
236 was 12.3g/dL (SD: 1.5g/dL) (Table 1). Anemia at baseline was less common among students in  
237 Bvumbwe compared to those in other schools, and less common among girls than boys.  
238 However, baseline anemia was more common among students with a positive RDT and students  
239 with recent fever (Supplemental Table S2). In analysis accounting for baseline anemia and  
240 treatment status, risk of anemia six weeks after the intervention was not significantly associated  
241 with treatment status of the individual students (adjusted odds ratio (aOR): 1.14; 95% CI: 0.63,  
242 2.05;  $P=0.5420$ , Figure 3).

243

#### 244 **Clinical and parasitological outcomes of sub-patent infections**

245 To evaluate the consequences of sub-patent infections, we compared clinical and parasitological  
246 outcomes among students with sub-patent infection to uninfected students, defined as students  
247 with negative RDT, microscopy, and PCR at screening. Sub-patent infections at screening were  
248 not associated with adverse clinical outcomes at the six week follow-up, including fever (aOR

249 1.05 [95%CI:0.64,1.72]), antimalarial treatment (aOR 0.97 [95%CI: 0.40, 2.32]), anemia (aOR  
250 1.05 [95%CI:0.38,2.85]) or mean difference in hemoglobin concentration (g/dl) (0.04 [95%CI:-  
251 0,0.39) (Supplementary Table S3). However, baseline sub-patent infections persisted, with these  
252 infections increasing in density leading to detection by microscopy (aOR 9.54  
253 [95%CI:5.42,16.8]) and PCR (aOR 8.03 [95%CI:5.50,11.7]) during follow-up. Thirty-four  
254 percent (20/59) of students with sub-patent infections at baseline had positive RDTs at the six-  
255 week follow-up, suggesting that repeated screening-and-treatment may further reduce prevalence  
256 of infection.

## 257 **Discussion**

258 School-based screening-and-treatment is an attractive strategy to decrease the burden of malaria  
259 in school-age children. Our results show this strategy successfully decreased the burden of *Pf*  
260 infection, nearly halving the prevalence of infections detected by microscopy. However, the  
261 ability of RDTs to detect all infections varied by transmission setting, contributing to differences  
262 in the impact of the intervention. In lower, seasonal transmission settings, a large proportion of  
263 infections went untreated because they were sub-patent. While in higher transmission settings,  
264 the duration of the impact of screening-and-treatment was limited by new infections.

265  
266 Overall, our results provide insights on which settings and for which outcomes screening-and-  
267 treatment warrants further consideration as an approach to deliver school-based preventive  
268 treatment. The only published clinical trial evaluating school-based screening-and-treatment  
269 showed no long-term impact on *Pf* infection, anemia, or cognition.<sup>17</sup> However, the average  
270 transmission in the schools in that cluster-randomized trial in coastal Kenya was similar to  
271 transmission intensity of the lower, seasonal prevalence schools our study, where RDTs failed to

272 detect a large proportion of infections. While these sub-patent infections were not associated  
273 with clinical disease in our six-week follow-up period, they likely contribute to the lack of long  
274 term impact. The lack of efficacy of screening-and-treatment for other target populations,  
275 including malaria in pregnancy<sup>24</sup> and community-wide interventions<sup>25,26</sup> has also been attributed  
276 to the low sensitivity of currently available RDTs. The sensitivity and specificity of RDTs in our  
277 study were similar the prior school-based screen-and-treat trial and other community-based  
278 studies.<sup>17,27-29</sup>

279  
280 The different patterns of infection between treated and untreated students in both transmission  
281 settings have important implications for the design of school-based malaria control interventions.  
282 Our findings suggest that in settings with perennial, moderate-to-high transmission, the screen-  
283 and-treat approach using currently available screening tools may be effective in identifying and  
284 treating most infections but the duration of the impact is short-lived due to the high frequency of  
285 new infection. Thus, in these settings the design of the intervention could be improved by either  
286 repeating the intervention or by using a longer acting drug, such as dihydroartemisinin-  
287 piperaquine.

288  
289 In lower transmission settings where a high proportion of infections fall below the level of  
290 detection of commonly used point-of-care tests, a screening test with higher sensitivity than a  
291 standard RDT should improve the effectiveness of the screen-and-treat approach. Newly  
292 approved point-of-care tests are currently undergoing evaluation and may be suitable for use in  
293 school-based interventions, particularly in low transmission settings.<sup>30</sup>

294

295 The alternative to screening-and-treatment is providing treatment to all students without  
296 screening, as in intermittent preventive treatment, an approach used widely to prevent the  
297 adverse effects of malaria during pregnancy and for seasonal malaria prevention in children in  
298 some settings. In recent meta-analyses of preventive treatment in schoolchildren, the majority of  
299 studies provided treatment to all students enrolled in the intervention arm and showed substantial  
300 reductions of both *Pf* infection prevalence and clinical malaria.<sup>31</sup> This approach has the  
301 advantages of providing prophylaxis to all students regardless of their infection status and is  
302 easier to implement as no blood collection or time for testing is required. However, there are  
303 concerns about the cost-benefit of this approach if prevalence is low and the impact of selective  
304 pressure on drug resistant parasite resulting from such widespread administration of antimalarial  
305 drugs.

306  
307 While our findings provide new insights into the utility of school-based screen-and-treat  
308 approaches, there are some limitations. We designed our observational study to investigate the  
309 dynamics of infections in treated and untreated children after screening. While randomized trials  
310 provide more definitive conclusions about the efficacy of the intervention, our approach  
311 nevertheless enabled assessment of the effect of the intervention on parasite prevalence in  
312 students who did and did not receive treatment based on RDT results in varied transmission  
313 settings. However, the absence of a control arm complicates interpretation of some results. In the  
314 overall study population, prevalence of anemia was significantly lower six weeks after the  
315 intervention. However, in analyses that stratified students by baseline anemia and treatment  
316 status, the intervention was not associated with lower anemia at six weeks. This finding is likely  
317 due to our inability to control for complex confounders (e.g. nutritional status), and secular

318 trends leading to changes in anemia prevalence not related to the intervention. Furthermore, the  
319 study involved only six weeks of follow-up, limiting our ability to comment on the longer-term  
320 impacts of sub-patent infections.

321  
322 Given these results, the utility of the screen-and-treat approach using currently available RDTs  
323 must be evaluated based on the goal of treatment. Sub-patent infections were not associated with  
324 clinical disease over the course of follow-up in this population, and the intervention reduced the  
325 prevalence of infections detected by microscopy, suggesting that screening-and-treatment may  
326 be sufficient to reduce clinical malaria. However, screening-and-treatment failed to reduce  
327 anemia and, therefore, may not reduce the impact of malaria on cognitive function and  
328 education. The impact preventive treatment of malaria on these endpoints may be increased by  
329 either targeting all students with antimalarial medication through intermittent preventive  
330 treatment, and/or combining malaria preventive treatment with other interventions, such as  
331 deworming and nutrition programs, to jointly tackle the multiple etiologies of anemia in school-  
332 age children.

333  
334 While the primary aim of school-based malaria control is to decrease the adverse consequences  
335 of *Pf* infection in students, there may also be indirect effects on transmission in the  
336 community.<sup>32,33</sup> Increasing evidence suggests both school-age children and persistent infections  
337 contribute significantly to malaria transmission.<sup>34-36</sup> As such, studies of school-based malaria  
338 control interventions should also measure the indirect effects on malaria transmission in the  
339 community.

340

341 Given the high prevalence of *Pf* infection and the negative impacts of infection on the health and  
342 educational achievement of school-age children, development of strategies to decrease this  
343 burden is critical. School-based screening-and-treatment effectively reduced *Pf* infection in our  
344 study and is an attractive strategy as treatment is targeted to students with documented infection.  
345 Further studies are needed to evaluate this approach in different transmission settings as well as  
346 the utility of more sensitive screening tests for this purpose.

347

348 **Funding:** This work was supported by the U.S. National Institutes of Health [U19AI089683,  
349 K24AI114996 to M.K.L., and K23AI135076 to L.M.C], the Thrasher Research Fund Early  
350 Career Award [to L.M.C], and the Burroughs Wellcome Fund/American Society of Tropical  
351 Medicine and Hygiene Postdoctoral Fellowship in Tropical Infectious Diseases [to L.M.C.]

352

353 **Acknowledgements:** We thank Heidi Fancher and the administrative team at the Malaria Alert  
354 Center for their support in executing the study. We are grateful for the hard work and dedication  
355 of the field team, study nurses, teachers, school administrators who made the study possible.  
356 Most importantly, we thank the participants for their commitment and patience.

357

## 358 **References**

- 359 1. World Health Organization. *World Malaria Report 2019*. Geneva. Geneva; 2019.  
360 doi:Licence: CC BY-NC-SA 3.0 IGO
- 361 2. Nankabirwa J, Brooker SJ, Clarke SE, et al. Malaria in school-age children in Africa: an  
362 increasingly important challenge. *Trop Med Int Health*. August 2014.  
363 doi:10.1111/tmi.12374

- 364 3. Clarke SE, Jukes MCH, Njagi JK, et al. Effect of intermittent preventive treatment of  
365 malaria on health and education in schoolchildren: a cluster-randomised, double-blind,  
366 placebo-controlled trial. *Lancet*. 2008;372(9633):127-138. doi:10.1016/S0140-  
367 6736(08)61034-X
- 368 4. Gitonga CW, Edwards T, Karanja PN, Noor AM, Snow RW, Brooker SJ. Plasmodium  
369 infection, anaemia and mosquito net use among school children across different settings in  
370 Kenya. *Trop Med Int Health*. 2012;17(7):858-870. doi:10.1111/j.1365-3156.2012.03001.x
- 371 5. Barger B, Maiga H, Traore OB, et al. Intermittent preventive treatment using artemisinin-  
372 based combination therapy reduces malaria morbidity among school-aged children in  
373 Mali. *Trop Med Int Health*. 2009;14(7):784-791. doi:10.1111/j.1365-3156.2009.02294.x
- 374 6. Nankabirwa J, Cundill B, Clarke S, et al. Efficacy, safety, and tolerability of three  
375 regimens for prevention of malaria: a randomized, placebo-controlled trial in Ugandan  
376 schoolchildren. *PLoS One*. 2010;5(10):e13438. doi:10.1371/journal.pone.0013438
- 377 7. Nankabirwa JI, Wandera B, Amuge P, et al. Impact of intermittent preventive treatment  
378 with dihydroartemisinin-piperaquine on malaria in Ugandan schoolchildren: a  
379 randomized, placebo-controlled trial. *Clin Infect Dis*. 2014;58(10):1404-1412.  
380 doi:10.1093/cid/ciu150
- 381 8. Clarke SE, Rouhani S, Diarra S, et al. Impact of a malaria intervention package in schools  
382 on Plasmodium infection, anaemia and cognitive function in schoolchildren in Mali: a  
383 pragmatic cluster-randomised trial. *BMJ Glob Heal*. 2017;2(2):e000182.  
384 doi:10.1136/BMJGH-2016-000182
- 385 9. Yimgang D, Buchwald A, Coalson J, et al. Population attributable fraction of anemia  
386 associated with *P. falciparum* infection in children in Southern Malawi. *Am J Trop Med*



- 387            *Hyg.* 2020.
- 388    10.    Brooker S, Guyatt H, Omumbo J, Shretta R, Drake L, Ouma J. Situation analysis of  
389            malaria in school-aged children in Kenya - what can be done? *Parasitol Today*.  
390            2000;16(5):183-186. <http://www.ncbi.nlm.nih.gov/pubmed/10782073>. Accessed April 15,  
391            2019.
- 392    11.    King N, Dewey C, Borish D. Determinants of primary school non-enrollment and  
393            absenteeism: Results from a retrospective, convergent mixed methods, cohort study in  
394            rural western Kenya. *PLoS One*. 2015;10(9). doi:10.1371/journal.pone.0138362
- 395    12.    Thuilliez J, Sissoko MS, Toure OB, Kamate P, Berthélemy JC, Doumbo OK. Malaria and  
396            primary education in Mali: A longitudinal study in the village of Donéguébougou. *Soc Sci*  
397            *Med*. 2010;71(2):324-334. doi:10.1016/j.socscimed.2010.02.027
- 398    13.    Nankabirwa J, Wandera B, Kiwanuka N, Staedke SG, Kanya MR, Brooker SJ.  
399            Asymptomatic Plasmodium infection and cognition among primary schoolchildren in a  
400            high malaria transmission setting in Uganda. *Am J Trop Med Hyg*. 2013;88(6):1102-1108.  
401            doi:10.4269/ajtmh.12-0633
- 402    14.    Fernando D, De Silva D, Carter R, Mendis KN, Wickremasinghe R. A randomized,  
403            double-blind, placebo-controlled, clinical trial of the impact of malaria prevention on the  
404            educational attainment of school children. *Am J Trop Med Hyg*. 2006;74(3):386-393.  
405            doi:10.4269/ajtmh.2006.74.386
- 406    15.    Fernando D, de Silva D, Wickremasinghe R. Short-term impact of an acute attack of  
407            malaria on the cognitive performance of schoolchildren living in a malaria-endemic area of  
408            Sri Lanka. *Trans R Soc Trop Med Hyg*. 2003;97(6):633-639. doi:10.1016/S0035-  
409            9203(03)80093-7

- 410 16. Cohee LM, Opondo C, Clarke SE, et al. Preventive malaria treatment among school-aged  
411 children in sub-Saharan Africa: a systematic review and meta-analyses. *Lancet Glob Heal*.  
412 2020;8(12):e1499-e1511. doi:10.1016/S2214-109X(20)30325-9
- 413 17. Halliday KE, Okello G, Turner EL, et al. Impact of intermittent screening and treatment  
414 for malaria among school children in Kenya: a cluster randomised trial. *PLoS Med*.  
415 2014;11(1):e1001594. doi:10.1371/journal.pmed.1001594
- 416 18. Okell LC, Cairns M, Griffin JT, et al. Contrasting benefits of different artemisinin  
417 combination therapies as first-line malaria treatments using model-based cost-  
418 effectiveness analysis. *Nat Commun*. 2014;5. doi:10.1038/ncomms6606
- 419 19. Okell LC, Bousema T, Griffin JT, Ouédraogo AL, Ghani AC, Drakeley CJ. Factors  
420 determining the occurrence of submicroscopic malaria infections and their relevance for  
421 control. *Nat Commun*. 2012;3:1237. doi:10.1038/ncomms2241
- 422 20. Walldorf JA, Cohee LM, Coalson JE, et al. School-Age Children Are a Reservoir of  
423 Malaria Infection in Malawi. *PLoS One*. 2015;10(7):e0134061.  
424 doi:10.1371/journal.pone.0134061
- 425 21. Harris PA, Taylor R, Thielke R, Payne J, Gonzalez N, Conde JG. Research electronic data  
426 capture (REDCap)—A metadata-driven methodology and workflow process for providing  
427 translational research informatics support. *J Biomed Inform*. 2009;42(2):377-381.  
428 doi:10.1016/j.jbi.2008.08.010
- 429 22. The RTS S/CTP. A Phase 3 Trial of RTS,S/AS01 Malaria Vaccine in African Infants. *N*  
430 *Engl J Med*. 2012;367(24):2284-2295. doi:10.1056/NEJMoa1208394
- 431 23. Coalson JE, Walldorf JA, Cohee LM, et al. High prevalence of *Plasmodium falciparum*  
432 gametocyte infections in school-age children using molecular detection: patterns and

- 433 predictors of risk from a cross-sectional study in southern Malawi. *Malar J.* 2016;15(15).  
434 doi:10.1186/s12936-016-1587-9
- 435 24. Desai M, Hill J, Fernandes S, et al. Prevention of malaria in pregnancy. *Lancet Infect Dis.*  
436 2018;18(4):e119-e132. doi:10.1016/S1473-3099(18)30064-1
- 437 25. Tiono AB, Ouédraogo A, Ogotu B, et al. A controlled, parallel, cluster-randomized trial of  
438 community-wide screening and treatment of asymptomatic carriers of *Plasmodium*  
439 *falciparum* in Burkina Faso. *Malar J.* 2013;12:79. doi:10.1186/1475-2875-12-79
- 440 26. Samuels AM, Odero NA, Odongo W, et al. Impact of Community-Based Mass Testing  
441 and Treatment on Malaria Infection Prevalence in a High-Transmission Area of Western  
442 Kenya: A Cluster Randomized Controlled Trial. *Clin Infect Dis.* April 2020.  
443 doi:10.1093/cid/ciaa471
- 444 27. Tiono AB, Ouédraogo A, Diarra A, et al. Lessons learned from the use of HRP-2 based  
445 rapid diagnostic test in community-wide screening and treatment of asymptomatic carriers  
446 of *Plasmodium falciparum* in Burkina Faso. *Malar J.* 2014;13:30. doi:10.1186/1475-2875-  
447 13-30
- 448 28. Ruizendaal E, Schallig HDFH, Scott S, et al. Evaluation of malaria screening during  
449 pregnancy with rapid diagnostic tests performed by community health workers in Burkina  
450 Faso. *Am J Trop Med Hyg.* 2017;97(4):1190-1197. doi:10.4269/ajtmh.17-0138
- 451 29. Nankabirwa JI, Yeka A, Arinaitwe E, et al. Estimating malaria parasite prevalence from  
452 community surveys in Uganda: a comparison of microscopy, rapid diagnostic tests and  
453 polymerase chain reaction. *Malar J.* 2015;14(1):528. doi:10.1186/s12936-015-1056-x
- 454 30. World Health Organization. WHO technical consultation on research requirements to  
455 support policy recommendations on highly sensitive point-of-care diagnostics for P.

- 456 falciparum malaria. [https://www.who.int/malaria/mpac/mpac-october2018-session7-](https://www.who.int/malaria/mpac/mpac-october2018-session7-report-high-sensitive-poct.pdf)  
457 [report-high-sensitive-poct.pdf](https://www.who.int/malaria/mpac/mpac-october2018-session7-report-high-sensitive-poct.pdf). Published 2018. Accessed October 18, 2020.
- 458 31. Cohee LM, Opondo C, Clarke S, Halliday K, Jorge Cano, Andrea G Shipper, Breanna  
459 Barger-Kamate, Abdoulaye Djimde, Seybou Diarra, Aditi Dokras, Moses R Kanya,  
460 Pascal Lutumba, Alioune Badara Ly, Joaniter I Nankabirwa, J Kiambo Njagi, Hama  
461 Maiga, Catherine Maiteki-Sebuguzi, Junior Matangila, George EAI, Chico RM.  
462 Preventive malaria treatment among school-age children in sub-Saharan Africa: A  
463 systematic review and meta-analyses. *Lancet Glob Heal*. 2020;In press.
- 464 32. Staedke SG, Maiteki-Sebuguzi C, Rehman AM, et al. Assessment of community-level  
465 effects of intermittent preventive treatment for malaria in schoolchildren in Jinja, Uganda  
466 (START-IPT trial): a cluster-randomised trial. *Lancet Glob Heal*. 2018;6(6):e668-e679.  
467 doi:10.1016/S2214-109X(18)30126-8
- 468 33. McCann RS, Cohee LM, Goupeyou-Youmsi J, Laufer MK. Maximizing Impact: Can  
469 Interventions to Prevent Clinical Malaria Reduce Parasite Transmission? *Trends*  
470 *Parasitol*. 2020;0(0). doi:10.1016/j.pt.2020.07.013
- 471 34. Mwesigwa J, Slater H, Bradley J, et al. Field performance of the malaria highly sensitive  
472 rapid diagnostic test in a setting of varying malaria transmission. *Malar J*. 2019;18(1).  
473 doi:10.1186/s12936-019-2929-1
- 474 35. Barry A, Bradley J, Stone W, et al. Increased gametocyte production and mosquito  
475 infectivity in chronic versus incident Plasmodium falciparum infections. *medRxiv*. April  
476 2020:2020.04.08.20057927. doi:10.1101/2020.04.08.20057927
- 477 36. Stone W, Gonçalves BP, Bousema T, Drakeley C. Assessing the infectious reservoir of  
478 falciparum malaria: past and future. *Trends Parasitol*. May 2015.

479            doi:10.1016/j.pt.2015.04.004

480

481

## 482 Tables

Table 1. Baseline characteristics of students enrolled in the study

|                                                    | <b>Total<br/>N=704</b> | <b>Bvumbwe<br/>n=184</b> | <b>Ngowe<br/>n=186</b> | <b>Maseya<br/>n=185</b> | <b>Makhuwira<br/>n=149</b> | <b>P<sup>a</sup></b> |
|----------------------------------------------------|------------------------|--------------------------|------------------------|-------------------------|----------------------------|----------------------|
| Female, n(%)                                       | 382(54.3)              | 118(64.1)                | 94(50.5)               | 92(49.7)                | 78(52.4)                   | 0.019                |
| Older school-age ( $\geq 10$ y), n(%)              | 513(72.9)              | 125(67.9)                | 129(69.4)              | 143(77.3)               | 116(77.9)                  | 0.067                |
| Slept under bed net last night <sup>b</sup> , n(%) | 309(49.3)              | 62(53.9)                 | 124(68.5)              | 65(35.3)                | 58(39.5)                   | <.0001               |
| Rainy season, n(%)                                 | 364(51.7)              | 99(53.8)                 | 100(53.8)              | 97(52.4)                | 68(45.6)                   | 0.411                |
| Anemic <sup>c</sup> , n(%)                         | 106(15.1)              | 9(4.9)                   | 35(18.8)               | 34(18.4)                | 28(18.8)                   | 0.0002               |
| Hemoglobin in g/dL, mean (SD)                      | 12.3 (1.5)             | 13.1 (1.3)               | 12.0 (1.5)             | 11.9 (1.3)              | 11.9 (1.3)                 | <.0001               |
| Fever last 48 hours <sup>d</sup> , n(%)            | 192(27.8)              | 28(15.5)                 | 53(29.6)               | 64(34.8)                | 47(32.0)                   | 0.0002               |
| Recent malaria treatment <sup>e</sup> , n(%)       | 121(17.4)              | 25(13.7)                 | 33(18.2)               | 35(19.0)                | 28(19.1)                   | 0.479                |
| RDT Positive, n(%)                                 | 259(36.8)              | 16(8.7)                  | 56(30.1)               | 91(49.2)                | 96(64.4)                   | <.0001               |
| Sub-patent infection <sup>f</sup> , n(%)           | 63(9.0)                | 12(6.5)                  | 10(5.4)                | 22(11.9)                | 19(12.8)                   | 0.031                |

<sup>a</sup> P-value of differences across school

<sup>b</sup> Net use data for Bvumbwe was only available in the dry season

<sup>c</sup> Defined as hemoglobin <11.0 g/dL

<sup>d</sup> Fever in the last 48 hours reported or measured temperature  $\geq 37.5^{\circ}\text{C}$

<sup>e</sup> Recent treatment defined as student or parent reported receipt of an effective antimalarial drug in the two weeks preceding the interview

<sup>f</sup> At baseline, 63 children had a negative RDT result but had a positive result for malaria PCR (n=61) or microscopy (n=2); higher proportion of *Pf* infections were sub-patent in Bvumbwe compared to the other three schools (42.8% [12/28] of infections were sub-patent vs. 17.3% [51/294], p=0.003)

483

484

Table 2. Associations with *P. falciparum* infections detected by RDT among enrolled students at baseline<sup>a</sup>

|                                        | n(%) <sup>b</sup> | Unadjusted Prevalence Ratio | Adjusted Prevalence Ratio |
|----------------------------------------|-------------------|-----------------------------|---------------------------|
| <b>School</b>                          |                   |                             |                           |
| Bvumbwe                                | 16(8.7)           | 1                           | 1                         |
| Ngowe                                  | 56(30.1)          | 3.9(2.2-6.7)                | 3.8(2.2, 6.6)             |
| Maseya                                 | 91(49.2)          | 6.3(3.7-10.6)               | 5.8(3.4, 9.8)             |
| Makhuwira                              | 96(64.4)          | 8.3(4.9-13.9)               | 7.4(4.4, 12.4)            |
| <b>Season</b>                          |                   |                             |                           |
| Rainy                                  | 159(43.7)         | 1                           | 1                         |
| Dry                                    | 100(29.4)         | 0.7(0.6-0.8)                | 0.7(0.6, 0.9)             |
| <b>Age (years)</b>                     |                   |                             |                           |
| 5 to 9                                 | 61(31.9)          | 1                           | 1                         |
| 10 to 15                               | 198(38.6)         | 1.3(1.0-1.6)                | 1.0(0.9, 1.3)             |
| <b>Sex</b>                             |                   |                             |                           |
| Male                                   | 141(43.8)         | 1                           | 1                         |
| Female                                 | 118(30.9)         | 0.7(0.6-0.9)                | 0.9(0.7, 1.0)             |
| <b>Anemic<sup>c</sup></b>              |                   |                             |                           |
| No                                     | 193(32.3)         | 1                           |                           |
| Yes                                    | 65(61.3)          | 1.9(1.6-2.3)                |                           |
| <b>Fever last 48 hours<sup>d</sup></b> |                   |                             |                           |
| No                                     | 170(34.1)         | 1                           |                           |
| Yes                                    | 84(43.8)          | 1.3(1.0-1.6)                |                           |
| <b>Recent medication<sup>e</sup></b>   |                   |                             |                           |
| No                                     | 193(33.6)         | 1                           |                           |
| Yes                                    | 62(51.2)          | 1.5(1.2-1.9)                |                           |
| <b>Slept under bed net last night</b>  |                   |                             |                           |
| No                                     | 150(37.9)         | 1                           |                           |
| Yes                                    | 109(35.3)         | 0.9(0.8-1.1)                |                           |

<sup>a</sup> Log-binomial model with school, season, age and sex retained in model *a priori*, all other variables retained if  $p < .05$ . With the exception of incomplete data, univariate associations were assessed in 704 children, among whom 9 were missing data for recent medication, 13 were missing data for fever in last 48 hours, and 1 was missing data for anemia. The final model included 690 children.

<sup>b</sup> Number and percent of children with a positive RDT result within each strata; children with a positive RDT result at baseline were treated and children with a negative RDT result at baseline were not treated.

<sup>c</sup> Defined as hemoglobin less than 11.0 g/dL

<sup>d</sup> Fever in the last 48 hours reported or measured temperature  $\geq 37.5^\circ\text{C}$

<sup>e</sup> Recent treatment defined as student or parent reported receipt of an effective antimalarial drug in the two weeks preceding the interview

486

Table 3: Adjusted prevalence and mean of infection outcomes at baseline and six weeks after the intervention<sup>a</sup>

|                                           | <b>Prevalence at baseline<br/>(95% CI)</b> | <b>Prevalence at six weeks<br/>(95% CI)</b> | <b>Adjusted relative difference<sup>b</sup><br/>(95% CI)</b> | <b>p-value</b> |
|-------------------------------------------|--------------------------------------------|---------------------------------------------|--------------------------------------------------------------|----------------|
| Microscopy positive – All schools         | 13.5% (11.2, 16.4)                         | 7.1% (5.7, 8.9)                             | -47.1% (-34.0, -57.6)                                        | <0.0001        |
| High transmission <sup>c</sup>            | 28.7% (23.8, 34.6)                         | 16.6% (13.2, 20.9)                          | -42.1% (-25.4, -55.1)                                        | <0.001         |
| Lower, seasonal transmission <sup>d</sup> | 6.7% (4.6, 9.6)                            | 2.2% (1.2, 4.4)                             | -66.8% (-30.8, -84.0)                                        | 0.003          |
| PCR positive – All schools                | 31.2% (27.9, 34.9)                         | 24.0% (21.2, 27.1)                          | -23.1% (-12.5, -32.5)                                        | 0.0002         |
| High transmission                         | 55.3% (49.3, 62.0)                         | 36.0% (30.8, 41.9)                          | -35.0% (-26.4, -39.9)                                        | <0.001         |
| Lower, seasonal transmission              | 12.6% (9.7, 16.5)                          | 14.3% (11.2, 18.3)                          | +13.3% (-11.5, +66.7)                                        | 0.40           |

<sup>a</sup> GEE models for overall prevalence adjusted *a priori* for sex, age, school and season, Log-binomial models by transmission setting adjusted *a priori* for sex, age, and season

<sup>b</sup> Relative difference in prevalence is the difference between prevalence at baseline and after six weeks divided by baseline prevalence.

<sup>c</sup> High transmission schools were in Maseya and Makhuwira

<sup>d</sup> Lower, seasonal transmission schools were in Bvumbwe and Ngowe

487



488 **Figure Legends**

489 Figure 1: Enrollment and follow-up of participants in school-based cohorts

490 Figure 2: Proportion of *P. falciparum* infections stratified by school, treatment status, and

491 detection method. Low, seasonal transmission schools (Bvumbwe-blue circles; Ngowe-red

492 squared) and infections detected by microscopy (A) and PCR (C). High transmission

493 schools (Maseya-green x's; Makhuwira-orange triangles) and detection by microscopy (B)

494 and PCR (D). Treated students-solid lines; Untreated students-hashed lines.

495 Figure 3: Proportion of students with anemia six weeks after the intervention by baseline anemia

496 and treatment, adjusted for school, sex, season, and age. Unadjusted data in Supplement

497 Figure S2.

498

499 Figure 1: Enrollment and follow-up of participants in school-based cohorts

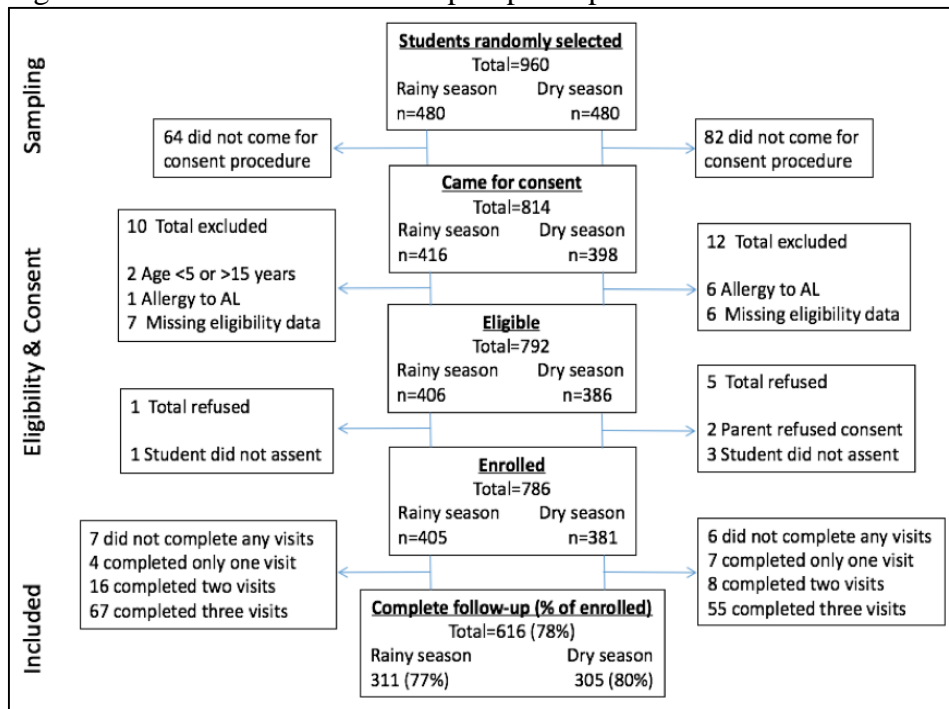

500

501

502 Figure 2: Proportion of *P. falciparum* infections stratified by school, treatment status, and  
503 detection method. Low, seasonal transmission schools (Bvumbwe-blue circles; Ngowe-red  
504 squared) and infections detected by microscopy (A) and PCR (C). High transmission  
505 schools (Maseya-green x's; Makhuwira-orange triangles) and detection by microscopy (B)  
506 and PCR (D). Treated students-solid lines; Untreated students-hashed lines.

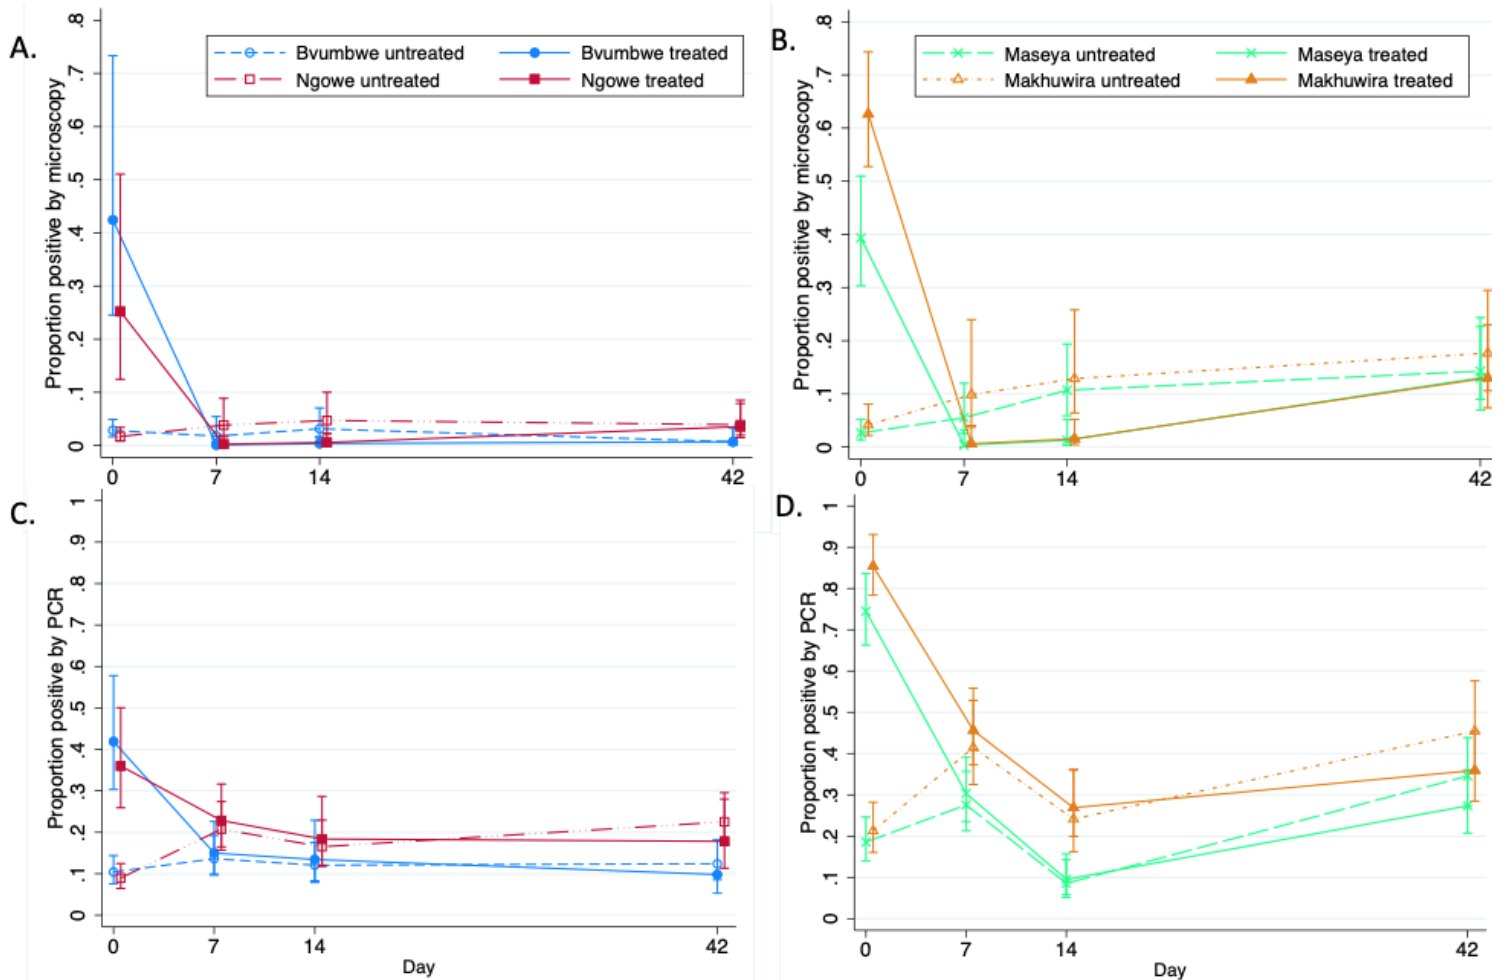

508

509

510 Figure 3: Proportion of students with anemia six weeks after the intervention by baseline anemia  
511 and treatment, adjusted for school, sex, season, and age. Unadjusted data in Supplement  
512 Figure S2.

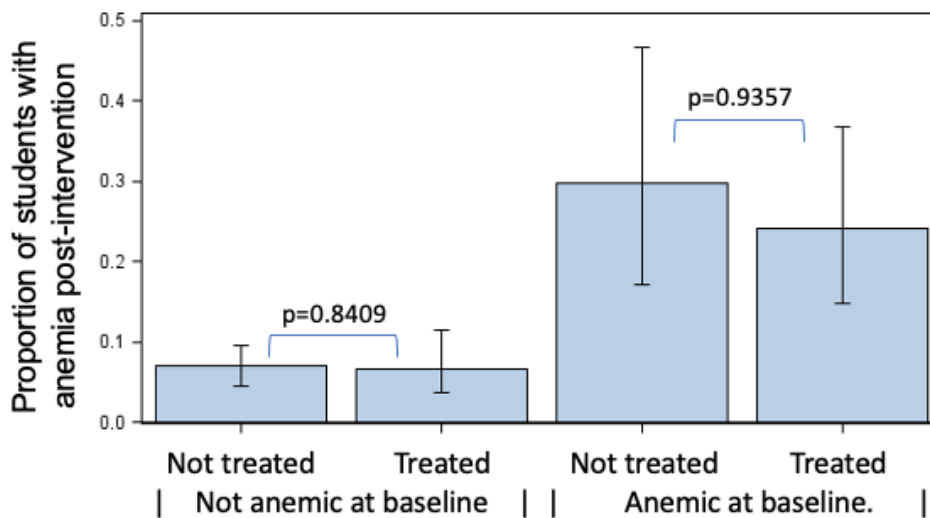

513
